1 **Transcriptomic stability or lability explains sensitivity to climate stressors in coralline**

2 **algae**

3

4

5 Tessa M. Page<sup>1\*</sup>, Carmel McDougall<sup>1</sup>, Ido Bar<sup>1,2</sup>, Guillermo Diaz-Pulido<sup>1\*</sup>

6

7 <sup>1</sup>Griffith University School of Environment and Science and Australia Rivers Institute

8 Nathan Campus, Griffith University, 170 Kessels Road, Nathan, QLD 4111, Australia

9

10 <sup>2</sup>Environment Futures Research Institute

11 Nathan Campus, Griffith University, 170 Kessels Road, Nathan, QLD 4111, Australia

12

13 \* Corresponding authors

14 Email: [tessa.page@griffithuni.edu.au](mailto:tessa.page@griffithuni.edu.au)

15 Email: [g.diaz-pulido@griffith.edu.au](mailto:g.diaz-pulido@griffith.edu.au)

16

17

18

19

20

21

22

23

24

25

26

27

28

29

30

31

32

33

34 **Abstract**

35

36           Crustose coralline algae (CCA) are a group of calcifying red macroalgae crucial to  
37 tropical coral reefs because they form crusts that cement together the reef framework<sup>1</sup>.  
38 Previous research into the responses of CCA to ocean warming (OW) and ocean acidification  
39 (OA) have found reductions in calcification rates and survival<sup>2,3</sup>, with magnitude of effect  
40 being species-specific. Responses of CCA to OW and OA could be linked to evolutionary  
41 divergence time and/or their underlying molecular biology, the role of either being unknown  
42 in CCA. Here we show *Sporolithon durum*, a species from an earlier diverged lineage that  
43 exhibits low sensitivity to climate stressors, had little change in metabolic performance and  
44 did not significantly alter the expression of any genes when exposed to temperature and pH  
45 perturbations. In contrast, *Porolithon onkodes*, a species from a recently diverged lineage,  
46 reduced photosynthetic rates and had over 400 significantly differentially expressed genes in  
47 response to experimental treatments, with differential regulation of genes relating to  
48 physiological processes. We suggest earlier diverged CCA may be resistant to OW and OA  
49 conditions predicted for 2100, whereas taxa from more recently diverged lineages with  
50 demonstrated high sensitivity to climate stressors may have limited ability for  
51 acclimatisation.

52

53 **Main**

54           Uncertainties associated with global change have presented challenges for predicting  
55 the persistence of species in the ocean. Transcriptomic profiling allows for investigation of  
56 molecular responses of organisms to stressors and can be informative in indicating  
57 mechanisms for resistance or adaptation<sup>4</sup> such as tolerance<sup>5-7</sup> and plasticity<sup>6</sup>, or can indicate  
58 sensitivity<sup>5-7</sup>. Resistance and adaptation as responses to climate stressors can be measured at  
59 a molecular level with transcriptomics and can be seen through transcriptomic plasticity (i.e.,

60 shifting expression profile of transcriptome) or as a muted or dampened transcriptomic  
61 response<sup>6,8</sup>. Phenotypic plasticity is a possible response to a changing environment, with the  
62 transcriptome being a phenotype that responds to environmental cues<sup>6,9</sup>, however, plasticity  
63 does not always indicate acclimatisation or adaptive strategy<sup>10</sup>. Environmental stressors can  
64 destabilise the transcriptome causing differential regulation of genes. This transcriptomic  
65 lability can be indicative of a deleterious stress outcome<sup>6,11-13</sup>. Conversely, a muted or  
66 dampened transcriptional response, which we refer to as transcriptomic stability, can indicate  
67 resistance<sup>6,8,14</sup>. Transcriptomic stability as a means for resistance to stressors has been  
68 documented in both gymnosperms (pines<sup>11,12</sup>) and angiosperms (tomato plants<sup>13</sup> and  
69 *Arabidopsis thaliana*<sup>5</sup>). However, the prevalence of transcriptomic stability vs lability has not  
70 been investigated in arguably one of the most important group of “plants” in the ocean,  
71 crustose coralline algae (CCA). This may be particularly critical for understanding the  
72 molecular and cellular responses of marine algae to climate stressors.

73

74 CCA are important marine organisms because of their role as ecosystem engineers  
75 (e.g., construction of coral reefs and maerl beds<sup>15</sup>) and their contribution to the global carbon  
76 cycle<sup>16</sup>. Some CCA genera have persisted and diversified through times of elevated  
77 temperature and  $p\text{CO}_2$ /reduced pH that equal or surpass levels projected for the year 2100<sup>17-</sup>  
78 <sup>19</sup>. One could speculate that the evolutionary environmental histories of some genera of CCA  
79 would result in inherent resistance to OW and OA, compared with recently diverged genera  
80 that have not been exposed to levels of seawater temperature and  $p\text{CO}_2$ /pH that are more  
81 extreme than current ocean conditions<sup>17,18</sup>. Previous experiments have found CCA to be  
82 negatively impacted by OW and OA<sup>2,20</sup>, however, there is obvious variability in type and  
83 magnitude of response that seems to be species-specific. Whether this variability relates to  
84 divergent evolutionary histories remains unexplored. From previous literature, earlier

85 diverging lineages tend to be more resistant to OW and OA<sup>21,22</sup>, whereas more recently  
86 diverged genera seem to be more sensitive<sup>2,18,22,23</sup> (Fig. 1a,b, Supplementary Table 1).  
87 Investigating the molecular basis of these responses could reveal the mechanisms by which  
88 resistance is obtained and facilitate comparisons between species with differing evolutionary  
89 histories.

90

91 To do this, we exposed two divergent species, *Sporolithon* cf. *durum* and *Porolithon*  
92 cf. *onkodes*, to differing levels of temperature and pH, selected to reflect both current  
93 conditions and those projected for year 2100<sup>19</sup>. Experiments were conducted for 3 months.  
94 The following treatments were used: control (“control”: 27.2 °C and 8.0 pH), elevated  
95 temperature (“T”: 29.5 °C and 8.0 pH), reduced pH (“pH”: 27.2 °C and 7.7 pH), and  
96 combined stressors (“T+pH”: 29.5 °C and 7.7 pH). Physiological responses were measured,  
97 and RNA sequencing analysis was used to investigate transcriptomic stability or lability as a  
98 means to propose resistance or sensitivity in CCA. Transcriptomic response expression data  
99 was validated through RT-qPCR (see Methods).

100

101 The more recently diverged species, *P. onkodes*, showed transcriptomic lability, with  
102 473 differentially expressed genes (DEGs) after 3 months in experimental treatments. *S.*  
103 *durum*, the earlier diverged lineage, had 0 DEGs, which we propose equates to transcriptomic  
104 stability. The transcriptional response in *P. onkodes* was only observed under the combined  
105 stressor treatment (T+pH; Fig. 1), only one gene (containing a lipoxygenase domain) was  
106 differentially expressed between the control and a single-stressor treatment (pH). The  
107 transcriptomic findings reflected physiological results, in which *S. durum* was proposed to be  
108 resistant to OW and OA in terms of survival and metabolic rates<sup>21</sup>, whereas net  
109 photosynthesis of *P. cf. onkodes* was significantly negatively affected under the combined

110 treatment of T+pH (ANOVA,  $F_{1,16} = 4.782$ ,  $p = 0.046$ , Supplementary Fig. 1, Supplementary  
111 Table 2). The nature of the molecular response to OW and OA was unknown in CCA, but, as  
112 shown here, likely underlies potential resistance or susceptibility. Our study demonstrates  
113 that transcriptional response is also species-specific and the observed transcriptional stability  
114 or lability could be related to divergence time of CCA species.

115

116

117

118

119

120

121

122

123

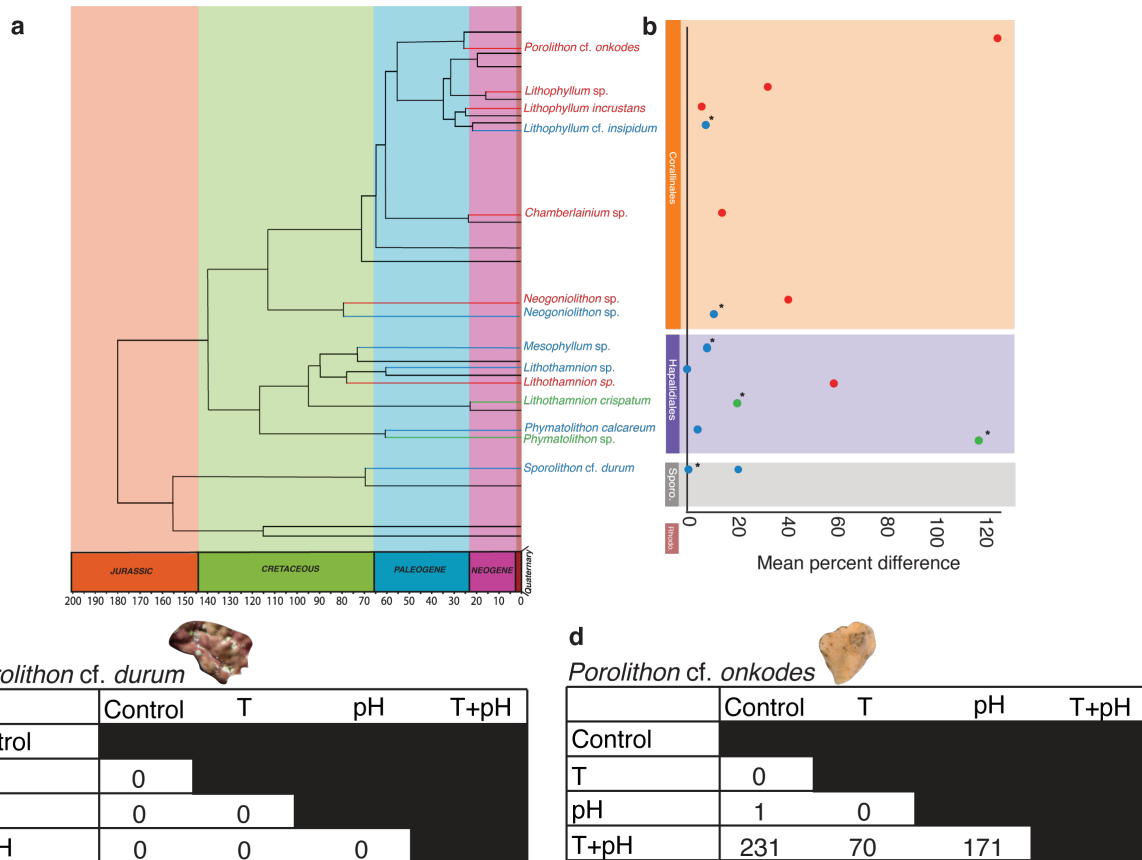

124

125 **Figure 1 Variable responses of species from different orders of CCA to global change**  
 126 **stressors from previous literature (a,b) and the current experiment (c,d).** **a**, Phylogenetic  
 127 tree, adapted from Peña, et al. <sup>18</sup>, showing different species across orders of CCA and their  
 128 estimated divergence time (x axis). Species names are colour coded to show direction of  
 129 response to elevated temperature + reduced pH; red - significant negative response; green -  
 130 significant positive response; blue - no significant effect. Data was obtained from 9 studies  
 131 (Supplementary Table 1). **b**, Graphical representation of response of species from  
 132 phylogenetic tree (Fig. 1a). Response is displayed as average relative change per species.  
 133 Asterisks signify results from studies using Pulse-Amplitude-Modulation fluorometry to  
 134 indicate photosynthesis, whereas all other studies directly measured dissolved O<sub>2</sub> in seawater.  
 135 from studies used in the reconstruction. **c**, Table of differentially expressed genes (DEGs)  
 136 detected in pairwise comparisons from edgeR analyses across four treatments, control (27.2  
 137 °C and 8.0 pH), T (29.5 °C and 8.0 pH), pH (27.2 °C and 7.7 pH), and T+pH (29.5 °C and 7.7  
 138 pH), for *S. cf. durum* and **d**, *P. cf. onkodes*.

139

140

141           The transcriptional response of *P. onkodes* likely reveals the molecular mechanisms  
142 underlying the observed physiological response to stress. 133 DEGs were uniquely found in  
143 the T+pH vs control comparison, and 27 were commonly differentially expressed across all  
144 treatments when compared to T+pH (Fig. 2a). Functional overrepresentation analysis of the  
145 133 DEGs revealed biological processes relating to catabolism and metabolism of  
146 polysaccharides, plastid organisation, and phospholipid biosynthesis, with the latter two  
147 containing largest number of transcripts, 4 and 5 respectively. 17 transcripts were related to  
148 processes involving carbohydrates and lipids. Carbohydrates, specifically polysaccharides,  
149 have been suggested to play a role in the calcification process of CCA by acting as a matrix  
150 for calcification in their primary cell wall<sup>24</sup>. Changes in calcification rates observed in  
151 previous studies<sup>2,23,25</sup> could potentially be explained by alterations of expression of these  
152 transcripts, with negative implications for reef formation and stability. Transcripts found  
153 across all T+pH comparisons were primarily overrepresented in biological functions relating  
154 to carbon acquisition and metabolism, suggesting the combination of elevated temperature  
155 and reduced pH results in changes to crucial, primary physical and chemical processes in *P.*  
156 *onkodes*.  
157

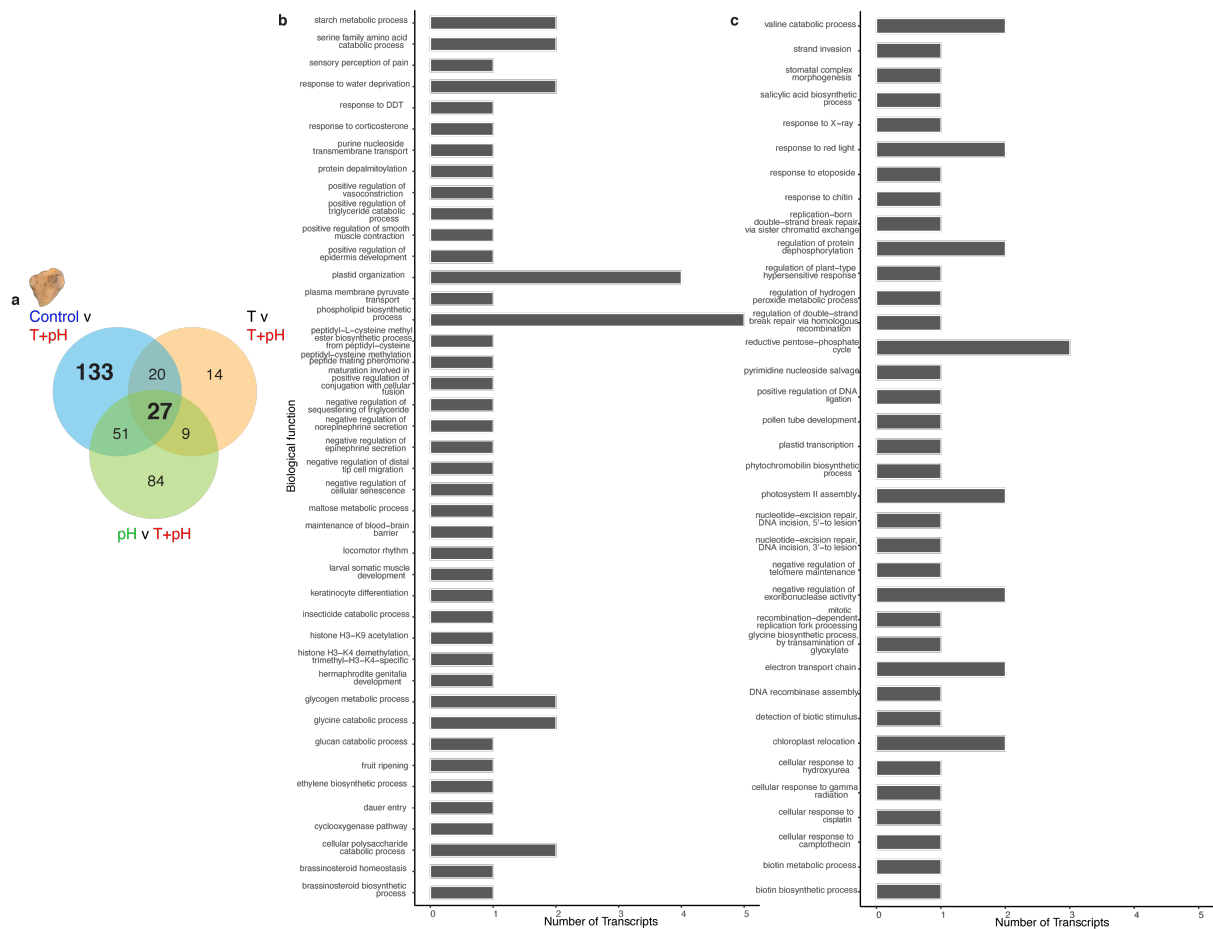

158

159 **Figure 2 Unique and common differentially expressed genes found in pairwise**  
 160 **comparisons between different experimental treatments. a, Venn diagram of DEGs found**  
 161 **in pairwise comparisons for *P. cf. onkodes* for all treatments compared to the T+pH**  
 162 **treatment. 27 common transcripts were found to be differentially expressed (DE) across all**  
 163 **comparisons. b, Terminal nodes of overrepresented biological processes of the 133**  
 164 **transcripts that were found to be uniquely DE between the control treatment (27.2 °C and 8.0**  
 165 **pH) and the T+pH treatment (+2.3 °C and -0.3 pH units). Graph displays biological processes**  
 166 **(y-axis) and number of transcripts per process (x-axis). c, Terminal nodes of overrepresented**  
 167 **biological processes of the 27 shared transcripts that were found to be commonly DE across**  
 168 **all comparisons. Graph displays biological processes (y-axis) and number of transcripts per**  
 169 **process (x-axis).**

170

171 Transcriptomic lability in *P. onkodes* was further observed in the patterns of  
 172 differentially regulated genes within the T+pH treatment (Fig. 3a). Upregulated transcripts  
 173 (130) were overrepresented in biological functional groups related to photorespiration,



174 glycine metabolism, the reductive pentose-phosphate cycle, chloroplast organisation, and  
175 nucleotide-excision repair (Fig. 3b). Downregulated transcripts (99) were involved in  
176 biological functional groups related to the following mitochondrial processes: protein  
177 processing, positive regulation of membrane potential, stress-induced fusion, positive  
178 regulation of DNA replication, and calcium ion transport (Fig. 3c). Mitochondria are the  
179 powerhouses of eukaryotic cells and a growing area of plant research involves linking  
180 mitochondrial function and composition to environmental stress response<sup>26,27</sup>. Our finding of  
181 overrepresentation of mitochondrial-related processes in downregulated genes supports a role  
182 for mitochondria in the stress response and physiological processes of *P. onkodes*.  
183 Downregulation could be indicative of a negative effect on physiological processes, as was  
184 suggested in Antarctic algae in response to heat stress<sup>28</sup>.

185

186

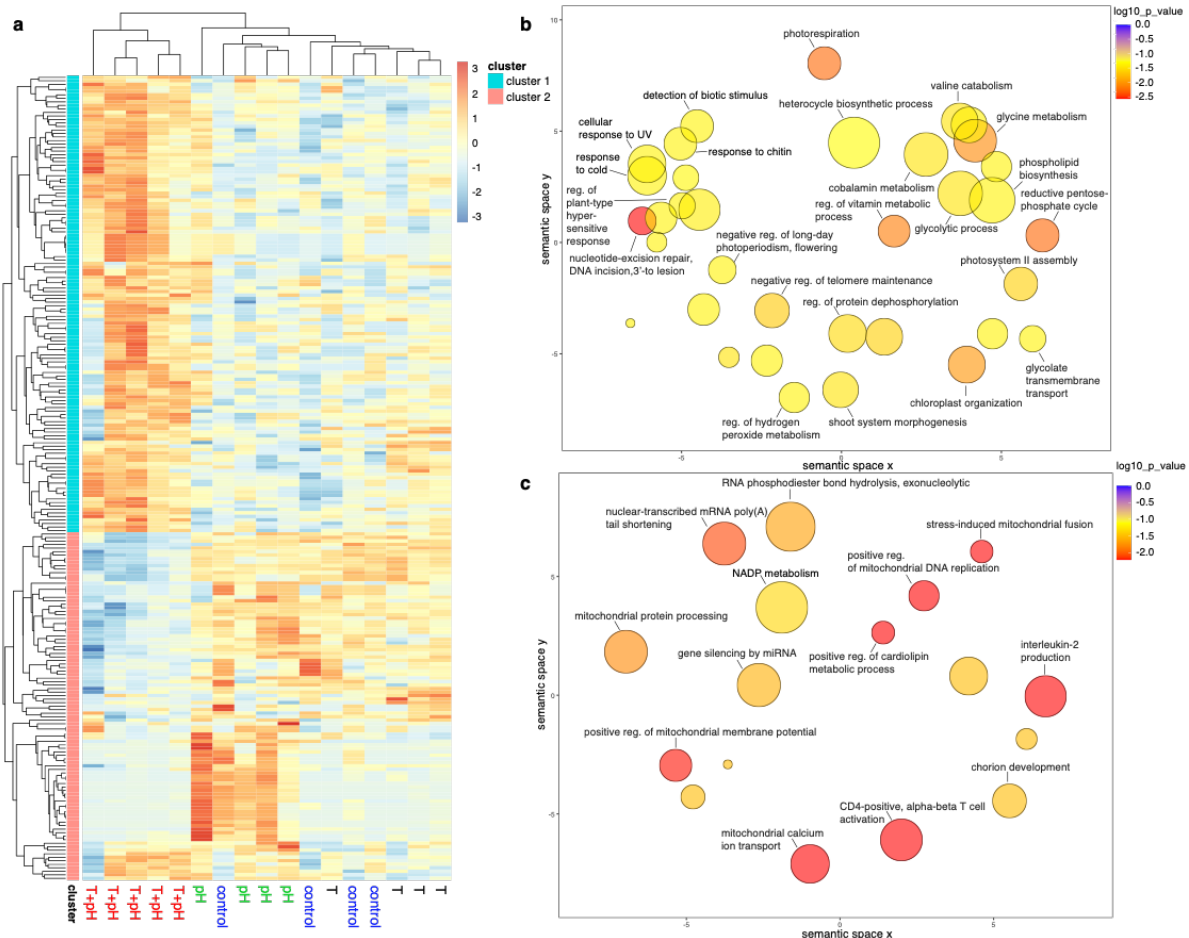

187

188 **Figure 3 Patterns of differentially regulated gene expression across *P. cf. onkodes***

189 **experimental treatments. a,** The T+ph treatment results in significantly upregulated and

190 downregulated transcripts when compared to other treatments (heatmap of log<sub>2</sub>-fold-change

191 FDR values <math>< 0.05</math>). Experimental treatments are labelled at the bottom of the heatmap. Two

192 main clusters corresponding primarily to upregulated (cluster 1) and downregulated (cluster

193 2) transcripts in the T+ph treatment are evident. **b,** Overrepresented biological processes

194 (terminal nodes; corrected p-values <math>< 0.05</math>) within cluster 1 transcripts include metabolism

195 and catabolism, response to stimuli (biotic and abiotic), and regulation. Circle size indicates

196 frequency of the gene ontology (GO) term in the UniProt database; colour indicates

197 significance, on log<sub>10</sub> p value scale. Axes have no intrinsic meaning; however, semantically

198 similar GO terms remain closely together in the plot. **c,** Biological processes corresponding to

199 terminal nodes from overrepresentation analysis of transcripts found in cluster 2 include

200 mitochondrial processes, chorion development, and immune response.

201

202           A large proportion (51 of 130) of the transcripts that were found to be upregulated in  
203 the T+pH treatment encoded enzymes, and many of these are known components of the  
204 phosphate pentose pathway (PPP). This indicates that crucial metabolic processes of *P.*  
205 *onkodes* are affected by the synergistic effects of OW and OA. To visualise this, the proposed  
206 cellular locations of a subset of proteins encoded by transcripts from significantly enriched  
207 terminal biological processes from this study are visualised in Fig. 4 (all proteins listed in  
208 Supplementary Data File 2). Enzymes involved in the non-oxidative branch of the PPP were  
209 downregulated, whereas enzymes involved in the oxidative branch of the PPP were both  
210 downregulated (G6PDH and 6PGL) and upregulated (6PGDH). All differentially expressed  
211 enzymes involved in glycolytic reactions were upregulated (Fig. 4). Enzymes involved in  
212 Calvin-cycle specific reactions that were differentially expressed included PRK (significantly  
213 upregulated) and RuBisCO (downregulated, but not significantly). Two proposed thylakoid  
214 membrane proteins (cytochrome  $b_6f$  and PGR5) were significantly upregulated; both of these  
215 proteins play a role in photosynthesis with involvement in either or both photosystem  
216 complexes. The mitochondrial proteins stomatin-2 and chaperone protein dnaJ were  
217 significantly downregulated; generally, upregulation of genes involved in protective stress  
218 responses (dnaJ) can facilitate a faster and more efficient response<sup>8</sup>. Collectively, these  
219 results indicate that global change drivers have a significant impact on the energy cycle of *P.*  
220 *cf. onkodes*. Enzymes involved in photorespiration were upregulated. Simultaneously, we  
221 found O<sub>2</sub> production decreased. We propose that reallocation of energy to photorespiration  
222 resulted in a decrease in the efficiency of photosynthesis and this was observed in the  
223 decrease in the rate of net photosynthesis/average O<sub>2</sub> production (Supplementary Figure 1).  
224

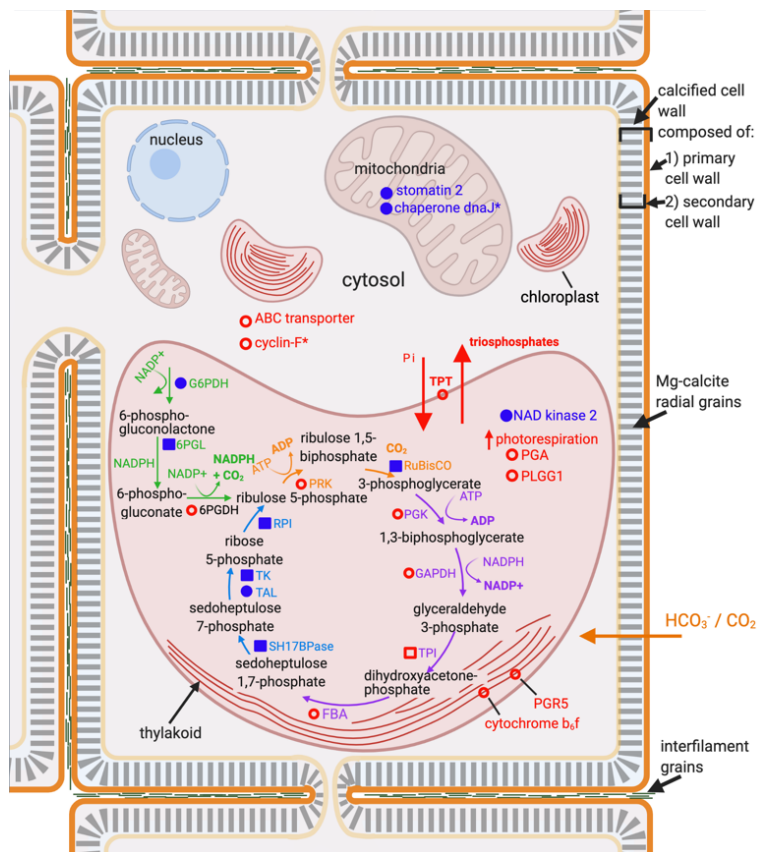

225

226 **Figure 4 Conceptual model of the cellular pathways affected by global change stressors**  
 227 **in *Porolithon cf. onkodes*.** Conceptual model shows proposed subcellular locations of  
 228 differentially expressed genes (DEGs) and proposed pathway involvement. Expression levels  
 229 of proteins and enzymes are based on results from differential expression and functional  
 230 overrepresentation analyses of transcripts within clusters 1 and 2 from Fig. 3a. Red open  
 231 circles denote significant (FDR < 0.05) upregulation and blue solid circles significant  
 232 downregulation under the T+pH treatment. Red open squares denote upregulated transcripts  
 233 that were found within the *P. onkodes* transcriptome and within edgeR differential expression  
 234 analysis but were not found to be significantly differentially expressed, and blue solid squares  
 235 were downregulated, transcripts that were not significantly differentially expressed. \* signify  
 236 proteins that could have other subcellular localisations based on database (UniProt<sup>29</sup> and  
 237 COMPARTMENTS) investigations. Enzymes encoded by transcripts from this study were  
 238 found in the Calvin-cycle (orange), glycolysis (purple), and the pentose phosphate pathway,  
 239 both the oxidative (green) and nonoxidative branch (blue), with these pathways being  
 240 proposed to occur within the plastid/chloroplast of the algae. Definitions of abbreviations for  
 241 proteins are found in Supplementary Table 4. HCO<sub>3</sub><sup>-</sup> and CO<sub>2</sub> are proposed to enter into the  
 242 cell and directly used as a substrate for photosynthesis and calcification. Conceptual model  
 243 was created with BioRender.com.

244

245           We propose that evolutionary history likely plays a role in resistance and  
246 susceptibility to stress amongst CCA species. To our knowledge, systematic studies that have  
247 specifically investigated differences in responses to stressors in the context of evolutionary  
248 history are lacking, however from the physiological studies available we suggest that  
249 divergence time could play a role in response (Fig. 1a,b). Studies from other taxa also support  
250 this theory. A review discussing temperature tolerance in terrestrial plants indicated a more  
251 tolerant species, *Arabidopsis thaliana*, had a muted transcriptional response compared with a  
252 less tolerant species, *Sorghum bicolor*<sup>5</sup>. Interestingly, these two species have divergent  
253 evolutionary histories, with the *Arabidopsis* genus having diverged ~43 mya<sup>30</sup> and the lineage  
254 containing *S. bicolor* estimated to have diverged between 3.9 – 2.4 mya<sup>31</sup>. Tolerance shown  
255 through transcriptomic stability or a muted transcriptomic response has been further  
256 documented in killifish that have evolved in high pollution conditions<sup>7</sup>. These findings are  
257 congruent with our hypothesis that evolutionary history may be a contributing factor to  
258 species-specific responses to stress. We propose that divergent evolutionary history may be  
259 an important driver behind the suggested resistance of *S. durum* to OA and OW, indicated in  
260 this study by transcriptomic stability and supported by prior studies<sup>21</sup>. On the other hand, the  
261 transcriptomic lability and negative effect of OW and OA on the physiology of *P. onkodes*  
262 suggests its overall sensitivity, which we propose is related to its more recent divergence.  
263 Future studies should continue to investigate the role of evolutionary history in response to  
264 climate stressors by systematically testing other possible contributing factors such as  
265 acclimatisation history and environmental history.

266

267           This study is the first to reveal differentially expressed genes and pathways that  
268 underpin physiological responses of CCA to stressors, and to implicate genes involved in  
269 crucial chemical and physical processes (i.e., PPP, glycolysis, Calvin-cycle, and

270 photorespiration). We propose that the differing transcriptional responses of CCA to global  
271 change drivers provides an explanation into the species-specific responses of CCA observed  
272 in previous studies. Our study shows a polarised transcriptomic response to climate stressors  
273 in coralline algae grown under identical experimental conditions, which is further supported  
274 by differences in physiological response. We suggest transcriptomic plasticity or lability, as  
275 seen in *P. onkodes*, is indicative of susceptibility to global change drivers, whereas  
276 transcriptomic stability, as seen in *S. durum*, is indicative of resistance in CCA taxa.  
277 Although it may be argued plasticity is an expression of adaptation, that is not always the  
278 case<sup>10</sup> and at times plasticity can be maladaptive or not contribute to increased resistance in  
279 an organism<sup>6,10</sup>. The findings from our study have implications for coral reefs worldwide.  
280 Our results indicate that *P. cf. onkodes*, an abundant reef-building species, may be negatively  
281 affected by predicted global change. In contrast, other tropical CCA species such as *S.*  
282 *durum*, although not currently major reef builders, may have the potential to thrive under  
283 predicted OW and OA scenarios.

284

## 285 **Methods**

### 286 **Algae collection and experimental treatments**

287 The two species used in this study were *Sporolithon cf. durum* and *Porolithon cf.*  
288 *onkodes*. These two species were chosen for the following reasons: 1) They are abundant,  
289 reef building species, with *P. onkodes* being the primary reef building species in the Great  
290 Barrier Reef (GBR), Australia; 2) *S. durum* and *P. onkodes* have been found to have different  
291 sensitivities to global change drivers from previous studies<sup>2,21</sup>; 3) *S. durum* and *P. onkodes*  
292 come from genera with different evolutionary divergence times<sup>18</sup>; and 4) they are two of the  
293 only four CCA species that currently have sequenced transcriptomes<sup>32</sup>.

294 Adult fragments,  $\sim 3 \text{ cm}^2$ , of CCA from the species *Sporolithon* cf. *durum* and  
295 *Porolithon* cf. *onkodes* were collected from lagoonal and reef crest sites surrounding Lizard  
296 Island, GBR, Australia. *S. durum* was collected between 7 – 9 m of depth and *P. onkodes* in  
297 depths no deeper than 3 m. Algal fragments were entirely crustose and were collected using  
298 hammer and chisel on SCUBA. Care was taken during collections to minimise impact on reef  
299 and distribute collections out over a wide area. After collection, algae fragments were  
300 transported to Lizard Island Research Station (LIRS) and held in an outdoor, flow through  
301 tank, maintaining similar seawater conditions to those measured at collection sites. Fragments  
302 were thoroughly cleaned of epiphytes within 24 hours of collection. Fragments that appeared  
303 to be very epiphytised (identified by large presence of burrowing worm holes and/or  
304 overabundance of epiphytic algae) were returned to collection sites. Fragments ( $n = 20$  per  
305 species) were kept in control aquarium conditions for seven days at ambient temperature (26  
306 °C), pH (8.00), salinity (35 ppt), and natural light ( $30 - 50 \mu\text{mol quanta m}^{-2} \text{ s}^{-1}$  for *S. durum*  
307 and  $140 \mu\text{mol quanta m}^{-2} \text{ s}^{-1}$  for *P. onkodes*) prior to being placed into experimental  
308 treatments. Light was measured using an underwater quantum sensor LI-192 connected to a  
309 light meter LI-250 (LI-COR, USA).

310 Following the seven-days in common garden, fragments of CCA were exposed to 3  
311 months of “control” (27.2 °C, 8.0 pH/450  $\mu\text{atm } p\text{CO}_2$ ), “T” (29.5 °C, 8.0 pH/450  $\mu\text{atm}$   
312  $p\text{CO}_2$ ), “pH” (27.2 °C, 7.7 pH/1000  $\mu\text{atm } p\text{CO}_2$ ), or “T+pH” (29.5 °C, 7.7 pH/1000  $\mu\text{atm}$   
313  $p\text{CO}_2$ ) treatments. Elevated temperature and  $p\text{CO}_2$  levels were selected to closely mimic  
314 future increases in temperature and  $p\text{CO}_2$  expected by the end of this century under the  
315 representative concentration pathway (RCP) 8.5<sup>19</sup>. In treatments where temperature and/or  
316  $p\text{CO}_2$  were manipulated, levels were increased over 7 days reaching a 2.5 °C increase in  
317 temperature and 0.3 unit decrease in pH ( $\sim 1000 \mu\text{atm } p\text{CO}_2$ ). Temperature was maintained  
318 using titanium heaters (EcoPlus, Aqua Heat, 300 W), which were placed within each sump

319 and were set to the desired temperature. Small 50 W glass heaters (Aqua One®) were placed  
320 in respective experimental tanks to correct for any heat loss when water moved from sump to  
321 experimental tanks. Temperature was adjusted daily across all treatments to mimic ambient  
322 temperature based on season (publicly available data from Australian Institute of Marine  
323 Science <https://weather.aims.gov.au/#/station/1166>) and +2.5 °C for elevated temperature  
324 treatments. pH/ $p\text{CO}_2$  was controlled by pH controllers (AquaController, Neptune Systems,  
325 USA) that injected either pure  $\text{CO}_2$  or ambient air into header sumps until set value was  
326 reached. Flow to each experimental tank was adjusted in the morning and evening,  
327 maintaining a flow rate of around  $20 \text{ L hr}^{-1}$ , which allowed for complete turnover in  
328 experimental tanks twice an hour. Submersible water pumps (Aqua One® 8 W) were placed  
329 in each experimental tank to ensure adequate water flow. Mortality and changes in health  
330 were monitored and recorded throughout the experiment.

331

### 332 **Physiological measurements**

333         Photosynthesis and respiration were measured for *P. onkodes* (pink morph) following  
334 techniques used in Page and Diaz-Pulido <sup>21</sup>. Physiological data for *S. durum* was obtained  
335 from Page and Diaz-Pulido <sup>21</sup> in which similar treatments of elevated temperature and  $p\text{CO}_2$   
336 were used however, conducted over a longer period of time (5 months versus 3 months in the  
337 current experiment). Physiological measurements of *P. onkodes* were normalised to surface  
338 area obtained through aluminium foil technique<sup>33</sup>.

339

### 340 **Seawater chemistry**

341         Temperature and seawater pH (measured on total scale,  $\text{pH}_T$ ) were measured twice  
342 per day, at 08:00 and 15:00 in each experimental tank using a pH electrode with integrated  
343 temperature probe (Mettler Toledo, InLab Routine Pro) attached to a pH meter (Mettler



344 Toledo, SevenGo Duo SG98). The pH electrode was calibrated on the total scale using Tris-  
345 HCl buffers<sup>34</sup>. Salinity was measured once a day using a conductivity meter (Mettler Toledo,  
346 SevenGo Pro). Total alkalinity ( $A_T$ ) was measured every 3 days for the first week of the  
347 experiment, and then every 6 – 7 days following using potentiometric titration on an  
348 automatic titrator (Mettler Toledo, T50) following standard operating procedures 3b<sup>34</sup>.  $pH_T$ ,  
349  $A_T$ , temperature, and salinity were used to calculate the remaining carbonate chemistry  
350 variables using the seacarb package version 3.2.12<sup>35</sup> in the statistical software R version 3.5.1  
351 (Supplementary Table 5). High-Mg calcite was calculated for a 16.4%  $MgCO_3$ , following  
352 method described in Diaz-Pulido, et al. <sup>2</sup>.

353

#### 354 **Sampling and RNA extraction**

355 Fragments of CCA were thoroughly cleaned prior to sampling for molecular analysis.  
356 Each fragment was examined under a microscope and all epiphytes, as far as possible, were  
357 removed. Directly before molecular sampling CCA were rinsed with filtered seawater and  
358 RNAlater® and then blotted with a kimwipe to remove bacterial film, following similar  
359 methods detailed in Page, et al. <sup>32</sup>. Only the top, pigmented layer of the CCA fragments was  
360 collected under a microscope using sterile razors and placed directly into RNAlater®. Care  
361 was taken to avoid collection of any endolithics when obtaining samples. Samples were left  
362 at 4 °C for 24 hrs and then transferred to -20 °C prior to being transported to Griffith  
363 University for analysis. RNA extraction procedure followed the method detailed in Page, et  
364 al. <sup>32</sup>. RNA quality and quantity were checked spectrophotometrically using an Invitrogen  
365 Qubit® Broad Range RNA kit. RNA yield ranged from 10.4 to 340 ng / $\mu$ l. One RNA sample  
366 of *S. durum* yielded an undetectable amount of RNA and therefore was not used for further  
367 analyses. A random selection of samples, 2 – 3 samples from each treatment and species,

368 were tested using the 4200 TapeStation System to ensure RNA quality and absence of  
369 degradation and contamination.

370

### 371 **cDNA synthesis and library preparation**

372 All samples were diluted to reach a concentration of 25 ng/μl in 4.5 μl total volume  
373 prior to cDNA synthesis and library preparation. cDNA synthesis and library preparation  
374 followed single-cell sequencing (CEL-Seq2) protocols detailed in Hashimshony, et al. <sup>36,37</sup>.  
375 Each sample ( $n = 39$ ) was annealed to a specific primer that was designed with an anchored  
376 polyT, a unique barcode (6 bp), a unique molecular identifier (UMI) (increased to 7 bp), the  
377 5' Illumina adapter, and a T7 promoter. 1 μl of an external RNA control developed by the  
378 External RNA Controls Consortium (ERCC), Ambion® 4456740, at 1:10,000 dilution was  
379 added to each sample to control for variation in RNA expression that could be attributed to  
380 factors such as quality of starting material, platform or user error, and level of cellularity and  
381 RNA yield. mRNA was converted into DNA using SuperScript® II for cDNA synthesis and  
382 samples were pooled and then cleaned using AMPure XP® beads. Quality and concentration  
383 of RNA and DNA were checked throughout CEL-Seq2 protocol to ensure good quality and  
384 quantity both by Qubit® and TapeStation System. Final DNA concentration for the pooled  
385 library was 15.6 ng/μl.

386

### 387 **Sequencing**

388 The pooled library was submitted to Ramaciotti Centre for Genomics, University of  
389 New South Wales, NSW, Australia. The library was cleaned up at Ramaciotti using AMPure  
390 XP® beads and passed additional quality control on both TapeStation and qPCR. Customised  
391 sequencing was performed on a single lane of an Illumina NovaSeq 6000, sequencing 26 bp

392 on read 1, and 100 bp on read 2. A technical issue was identified for one sample for *P.*  
393 *onkodes*, and this sample was not considered in downstream analyses after sequencing.

394

### 395 **Sequence and differential expression analyses**

396 Bioinformatic analyses were performed on Griffith University’s High Performance  
397 Computer Cluster, “Gowonda”, and statistical analyses and visualisations were performed  
398 using the statistical software R (v 3.6.1)<sup>38</sup>. Raw data were returned from Ramaciotti and  
399 processed using the Illumina BCL2FASTQ software, using default settings but with a  
400 minimum trimmed read length of 15. Quality control was performed on the FastQ files using  
401 FastQC (v 0.11.3, Babraham Bioinformatics). Reference transcriptomes were created using  
402 transcriptomes for *P. onkodes* and *S. durum*<sup>32</sup>. PolyA sequences were removed from  
403 reference transcriptomes using prinseq<sup>39</sup>. ERCC sequences, without polyA’s, were appended  
404 to the transcriptome files. Bowtie indices were generated using bowtie<sup>40</sup> v 2 – 2.0.2. The  
405 resulting FASTA files were used to generate files mimicking gene transfer format (gtf) files  
406 following protocol laid out in McDougall, et al. <sup>41</sup>. These “fake” gtf files were then used in  
407 the publicly available CEL-Seq-pipeline (<https://github.com/yanailab/CEL-Seq-pipeline>).  
408 Demultiplexed reads were mapped against the reference transcriptomes and read counts per  
409 transcript were generated. Samples that had less than 900,000 demultiplexed reads and had  
410 less than ~ 40% mapped reads were removed from further analyses ( $n = 2$  for *P. onkodes*)  
411 (Supplementary Table 6). Counts were imported into R (v 3.6.1) and corrected to account for  
412 the possibility of transcripts getting the same UMI. To correct for this and to convert UMI  
413 counts to transcript numbers the binomial method outlined in Grün, et al. <sup>42</sup> was used.  
414 Transcripts were filtered using a cut-off of 5 counts per transcript across all samples to  
415 remove transcripts with very low counts.

416 Differential gene expression analysis for each species was performed using the  
417 Bioconductor software package edgeR, v 3.16.8<sup>43</sup>. Negative binomial (NB) generalised linear  
418 models (GLMs) were fitted to transcript counts and common dispersions (0.169 and 0.293 for  
419 *P. onkodes* and *S. durum*, respectively) were estimated<sup>43</sup>. A design matrix of the experiment  
420 was used for analysis to identify expression in response to treatment. Quasi-likelihood (QL)  
421 F-tests were used in determining differential expression using default settings and the  
422 parameter ‘robust=TRUE’ to identify genes that were outliers from the mean-NB dispersion  
423 trend. Pairwise comparisons were conducted on specified constructed parameters (i.e.  
424 treatments) where genes that exhibited positive or negative log-fold changes were identified.  
425 Differentially expressed genes (DEGs) between treatments with a false discovery rate (FDR)  
426 cut-off of 5% and a log<sub>2</sub>-fold-change, looking at significantly expressed genes above a log<sub>2</sub>-  
427 fold-change of log<sub>2</sub> (i.e., a fold-change of 1.2), were extracted and the datasets concatenated  
428 to use for downstream analyses and visualisations. FDR correction was applied using the  
429 Benjamini-Hochberg method on the *p*-values<sup>43</sup>. Count data were also analysed with  
430 DESeq2<sup>44</sup> and pairwise comparisons were made to further validate edgeR analysis, DEG  
431 results were not significantly different between the two forms of analyses and *S. durum* still  
432 presented no significantly DEGs. To investigate DE expression further in *S. durum*, however,  
433 we used non-FDR corrected *p*-values to look at expression (Supplementary Figure 3).

434 Visualisation of DEGs was performed using variance stabilising transformed (vst)  
435 counts from edgeR. Principal component analyses were performed for each species to explore  
436 the variation in DEGs within species (Supplementary Figure 2). Heatmaps were constructed  
437 for DEGs from each species using the R package pheatmap (v 1.0.12)<sup>45</sup>. An FDR cut-off of  
438 0.05 was used when creating the heatmap. Functional overrepresentation analysis of  
439 differentially expressed transcripts was performed in the Cytoscape<sup>46</sup> plugin BiNGO<sup>47</sup>, where  
440 hypergeometric tests of gene ontology (GO) categories, specifically “biological process”,

441 were used, with the annotated transcriptome of *P. onkodes* as a ‘background’, and a *p*-value  
442 (Benajmini-Hochberg FDR correction) cut-off of 0.01. BiNGO also allowed for identification  
443 of terminal node biological processes. REVIGO<sup>48</sup> was used to summarise and visualise gene  
444 ontology terms obtained from enrichment analysis.

445 Similarity searches for DEGs were conducted using NCBI’s (National Center for  
446 Biotechnology Information) Basic Local Alignment Search Tool (BLAST)<sup>49</sup> using the default  
447 e-value cut-off of 0.01. In order to identify KEGG pathway components we used the KEGG  
448 Mapper – Reconstruct Pathway tool<sup>50</sup>. KEGG annotations were obtained for all expressed  
449 and differentially expressed genes for each species using previous KEGG annotations from  
450 previously annotated transcriptomes<sup>32</sup>. Proposed cellular locations and pathway involvement  
451 of DEGs used in Fig. 4 were based on BLASTX similarity searches and KEGG Mapper  
452 Reconstruction results. Subcellular localisations were obtained through BLASTX and further  
453 checked on the subcellular localisation database, COMPARTMENTS  
454 (<https://compartments.jensenlab.org/>).

455

#### 456 **RT-qPCR validation of expression results from CEL-Seq analysis**

457 For qPCR validation of CEL-Seq edgeR expression analysis, reference genes and  
458 genes of interest (GOI) were chosen from edgeR normalised reads data. To obtain reference  
459 genes, we used a coefficient variation (CV) model to assess the degree of variation for each  
460 gene from edgeR normalised reads data<sup>51</sup>. To calculate the CV, we found the ratio of the  
461 standard deviation to the mean of each gene, high CVs indicate more variation in expression  
462 of a gene, whereas low CVs indicate low variation. Reference genes were chosen if  $CV <$   
463 0.47 and also had a low standard deviation, and GOIs were chosen by looking for the highest  
464 CVs. Additionally, we performed reciprocal BLAST analyses with the transcriptomes of *S.*  
465 *durum* and *P. onkodes* to find orthologues of reference genes that have been used with other

466 species of red algae (i.e., the fleshy, red alga *Pyropia haitanensis*), such as  $\beta$ -tubulin and  
467 ubiquitin conjugating enzyme (UBC), and glyceraldehyde 3-phosphate dehydrogenase  
468 (GAPDH)<sup>52</sup>. GAPDH was only used as a reference gene for *S. durum* as it was found to have  
469 a low CV, however, GAPDH was used as a GOI for *P. onkodes* because it was found to be  
470 significantly differently expressed, with a high CV. Primers for GOIs were obtained from  
471 exploring *P. onkodes* edgeR data for highly, differentially expressed genes with large CVs,  
472 and then performing reciprocal blast in the *S. durum* transcriptome to find orthologues. Once  
473 genes were selected, primer sets were designed for reference genes and GOIs using  
474 Primer3<sup>53</sup>.

475 To test and optimise primer sets, cDNA was synthesised using Superscript III reverse  
476 transcriptase (Invitrogen™) from DNase treated RNA of *S. durum* and *P. onkodes* and  
477 pooled for each species. Pooled cDNA was used as a template for PCR. PCRs using a  
478 thermal gradient (55 °C – 65 °C) were conducted to test primers and identify optimal  
479 annealing temperatures of primer sets. PCRs were run with 0.5  $\mu$ L of forward and reverse  
480 primer (2.5  $\mu$ M), 4.5  $\mu$ L QuantiNova SYBR® Green PCR Master Mix, 3.5  $\mu$ L  
481 DNase/RNase-Free H<sub>2</sub>O (PCR grade), and 1  $\mu$ L cDNA pooled template (1:30 dilution). The  
482 thermal profile for PCR was 95 °C for 2 min, followed by 60 cycles of 95 °C for 5 s, thermal  
483 gradient (55 °C – 65 °C) for 30 s, and 60 °C for 10 s. PCRs were assessed by gel  
484 electrophoresis on a 2.5% agarose gels.

485 Subsequent RT-qPCR (CFX96 Touch™, Real-Time PCR Detection System, Bio-  
486 Rad) validation of reference genes and GOI was performed (Supplementary Table 7).  
487 Optimal dilution for each gene, primer efficiencies, and coefficient of determination ( $R^2$ )  
488 were obtained from serial dilutions of standard curves for each primer set (Supplementary  
489 Table 7). The thermal profile for RT-qPCR was 95 °C for 2 min, followed by 60 cycles of 95  
490 °C for 5 s, annealing temperature for specific primer set (identified from PCR) for 30 s, and

491 60 °C for 10 s, followed by a melt curve (65 °C to 95 °C in 0.5 °C increments for 5 s at each  
492 increment). RT-qPCR was then run for sample expression analysis. No template controls  
493 were included for each primer set and each sample and reactions were carried out in technical  
494 and biological triplicates. Suitable reference genes were calculated using geNorm<sup>54</sup> based on  
495 geometric means to determine which reference candidates would be used as reference for  
496 expression analysis. Expression analysis was carried out in BioRad's CFX Maestro Software,  
497 log<sub>2</sub> ΔΔCt values (relative expression) for each sample were calculated and *p* values obtained  
498 to assess significant differential expression across treatments and individuals (Supplementary  
499 Figures 4 & 5), values were normalised to reference genes and predetermined efficiencies of  
500 each primer were entered based on standard curves (Supplementary Table 7).

501

## 502 **Systematic review of previous research and phylogenetic tree reconstruction**

503 A systematic search for studies that investigated the metabolic responses of species of  
504 CCA to elevated temperature and ocean acidification (in combination) was conducted. The  
505 literature search was performed in the databases Google Scholar and Web of Science using  
506 keywords or topic codes such as '*crustose coralline algae*' or '*coralline algae*' in  
507 combination with '*photosynthesis, metabolic rates, ocean acidification, ocean warming,*  
508 *elevated temperature, reduced pH, elevated pCO<sub>2</sub>, global change or climate change*'. We  
509 focused on studies that measured photosynthesis using a similar methodology as that used in  
510 the current study and in Page and Diaz-Pulido<sup>21</sup>, however, as there were limited studies that  
511 fit our criteria, we supplemented the dataset with studies that used pulse amplitude modulated  
512 (PAM) fluorometry to determine photosynthetic capacity (Supplementary Table 1). The mean  
513 values of net photosynthesis or PAM fluorescence in the control and combined stressor  
514 treatments were obtained from publicly available datasets or, if results were only graphically  
515 represented, the built-in ruler and grids in Adobe Acrobat Pro DC v 2021.001.20138

516 (Adobe©) were used to obtain numerical values. Mean percent difference was calculated  
517 between control and the combined stressor treatment of elevated temperature and  
518  $p\text{CO}_2$ /reduced pH for each study (Supplementary Table 1). The absolute values of the percent  
519 differences were used in graphical representation. If studies manipulated other variables (i.e.,  
520 nutrients or light), the control conditions for those variables were used. If studies measured  
521 over seasons, the average values from control and combined were taken across seasons. Mean  
522 percent differences were graphically represented adjacent to a reconstructed phylogenetic tree  
523 displaying species found in this review. The phylogenetic tree was adapted from Peña, et al.  
524 <sup>18</sup>.

525

#### 526 **Statistical analyses for physiological data**

527         Physiological data was analysed in R (v 3.6.1). Data were tested for normality  
528 through graphical analyses of residuals, using QQ normality plots. Data were log transformed  
529 if they did not meet normality. Two-way ANOVAs were run for photosynthesis and  
530 respiration data using temperature and pH as fixed factors. If a significant interaction  
531 between treatments was identified, ANOVAs were followed by Tukey's HSD post hoc  
532 pairwise comparisons.

533

#### 534 **Supplementary Information**

535 Supplementary Information is available for this paper.

536

#### 537 **Data availability**

538 The datasets generated for this study can be found at  
539 [https://osf.io/2nkr4/?view\\_only=08620a44c3534723b94e1c5c9bdd3bb0](https://osf.io/2nkr4/?view_only=08620a44c3534723b94e1c5c9bdd3bb0).

540



## 541 Acknowledgements

542 This study was primarily funded by Australian Research Council grant DP160103071  
543 awarded to G.D-P and in part by funds from the PADI Foundation awarded to T.M.P. The  
544 authors would like to acknowledge Griffith University's High Performance Computer  
545 Cluster, "Gowonda", and Indy Silva for assistance using Gowonda. We also acknowledge  
546 Ellie Bergstrom, Alexander Carlson, and Alea Laidlaw for their assistance during the  
547 experiment and for day-to-day maintenance. The authors also thank Dr. David Lambert and  
548 Dr. Sally Wasef for allowing us access to the TapeStation. We also thank the directors and  
549 maintenance staff of Lizard Island Research Station for their assistance and continued  
550 support throughout the duration of this study.

551

## 552 References

- 553 1 Adey, W. H. Coral reefs: Algal structured and mediated ecosystems in shallow,  
554 turbulent, alkaline waters. *J Phycol* **34**, 393-406, doi:10.1046/j.1529-  
555 8817.1998.340393.x (1998).
- 556 2 Diaz-Pulido, G., Anthony, K. R. N., Kline, D. I., Dove, S. & Hoegh-Guldberg, O.  
557 Interactions between ocean acidification and warming on the mortality and  
558 dissolution of coralline algae. *J Phycol* **1**, 32-39, doi:10.1111/j.1529-  
559 8817.2011.01084.x (2012).
- 560 3 Cornwall, C. E., Diaz-Pulido, G. & Comeau, S. Impacts of ocean warming on  
561 coralline algal calcification: Meta-analysis, knowledge gaps, and key  
562 recommendations for future research. *Front Mar Sci* **6**, 186,  
563 doi:10.3389/fmars.2019.00186 (2019).
- 564 4 Mohr, H. & Schopfer, P. in *Plant Physiol* 539-566 (Springer Berlin Heidelberg,  
565 1995).
- 566 5 Raju, S. K. K., Barnes, A. C., Schnable, J. C. & Roston, R. L. Low-temperature  
567 tolerance in land plants: Are transcript and membrane responses conserved? *Plant Sci*  
568 **276**, 73-86, doi:10.1016/j.plantsci.2018.08.002 (2018).
- 569 6 Debiasse, M. B. & Kelly, M. W. Plastic and evolved responses to global change:  
570 What can we learn from comparative transcriptomics? *J Hered* **107**, 71-81,  
571 doi:10.1093/jhered/esv073 (2016).
- 572 7 Whitehead, A., Triant, D. A., Champlin, D. & Nacci, D. Comparative transcriptomics  
573 implicates mechanisms of evolved pollution tolerance in a killifish population. *Mol*  
574 *Ecol* **19**, 5186-5203, doi:10.1111/j.1365-294X.2010.04829.x (2010).
- 575 8 Rivera, H. E. *et al.* A framework for understanding gene expression plasticity and its  
576 influence on stress tolerance. *Mol Ecol*, doi:10.1111/mec.15820 (2021).

- 577 9 Oostra, V., Saastamoinen, M., Zwaan, B. J. & Wheat, C. W. Strong phenotypic  
578 plasticity limits potential for evolutionary responses to climate change. *Nat Commun*  
579 **9**, doi:10.1038/s41467-018-03384-9 (2018).
- 580 10 Grether, G. F. Environmental change, phenotypic plasticity, and genetic  
581 compensation. *Am Nat* **166**, E115-E123, doi:10.1086/432023 (2005).
- 582 11 Gaspar *et al.* Comparative transcriptomic response of two *Pinus* species to infection  
583 with the pine wood nematode *Bursaphelenchus xylophilus*. *Forests* **11**, 204,  
584 doi:10.3390/f11020204 (2020).
- 585 12 Fielding, N. & Evans, H. The pine wood nematode *Bursaphelenchus xylophilus*  
586 (Steiner and Buhner) Nickle (= *B. lignicolus* Mamiya and Kiyohara): An assessment  
587 of the current position. *J For* **69**, 35-46, doi:10.1093/forestry/69.1.35 (1996).
- 588 13 Bitá, C. E. *et al.* Temperature stress differentially modulates transcription in meiotic  
589 anthers of heat-tolerant and heat-sensitive tomato plants. *BMC Genomics* **12**, 384,  
590 doi:10.1186/1471-2164-12-384 (2011).
- 591 14 Bay, R. A. & Palumbi, S. R. Transcriptome predictors of coral survival and growth in  
592 a highly variable environment. *Ecol Evol* **7**, 4794-4803, doi:10.1002/ece3.2685  
593 (2017).
- 594 15 Nelson, W. A. Calcified macroalgae - critical to coastal ecosystems and vulnerable to  
595 change: A review. *Mar Freshw Res* **60**, 787, doi:10.1071/mf08335 (2009).
- 596 16 Van Der Heijden, L. H. & Kamenos, N. A. Reviews and syntheses: Calculating the  
597 global contribution of coralline algae to total carbon burial. *Biogeosciences* **12**, 6429-  
598 6441, doi:10.5194/bg-12-6429-2015 (2015).
- 599 17 Hönisch, B. *et al.* The geological record of ocean acidification. *Science* **335**, 1058-  
600 1063, doi:10.1126/science.1208277 (2012).
- 601 18 Peña, V. *et al.* Radiation of the coralline red algae (Corallinophycidae, Rhodophyta)  
602 crown group as inferred from a multilocus time-calibrated phylogeny. *Mol Phylogenet*  
603 *Evol* **150**, 106845, doi:10.1016/j.ympev.2020.106845 (2020).
- 604 19 IPCC. in *Summary for Policymakers. In: IPCC Special Report on the Ocean and*  
605 *Cryosphere in a Changing Climate* (eds Hans-O Pörtner *et al.*) (In press, 2019).
- 606 20 Kuffner, I. B., Andersson, A. J., Jokiel, P. L., Rodgers, K. u. S. & Mackenzie, F. T.  
607 Decreased abundance of crustose coralline algae due to ocean acidification. *Nat*  
608 *Geosci* **1**, 114-117, doi:10.1038/ngeo100 (2007).
- 609 21 Page, T. M. & Diaz-Pulido, G. Plasticity of adult coralline algae to prolonged  
610 increased temperature and *pCO*<sub>2</sub> exposure but reduced survival in their first  
611 generation. *PLoS One* **15**, e0235125, doi:10.1371/journal.pone.0235125 (2020).
- 612 22 Bergstrom, E. *et al.* Inorganic carbon uptake strategies in coralline algae: Plasticity  
613 across evolutionary lineages under ocean acidification and warming. *Mar Environ Res*  
614 **161**, 105107, doi:10.1016/j.marenvres.2020.105107 (2020).
- 615 23 Martin, S. & Gattuso, J.-P. Response of Mediterranean coralline algae to ocean  
616 acidification and elevated temperature. *Glob Chang Biol* **15**, 2089-2100,  
617 doi:10.1111/j.1365-2486.2009.01874.x (2009).
- 618 24 Bilan, M. I. & Usov, A. I. Polysaccharides of calcareous algae and their effect on the  
619 calcification process. *Russ J Bioorg Chem* **27**, 2-16, doi:10.1023/a:1009584516443  
620 (2001).
- 621 25 Qui-Minet, Z. N. *et al.* Combined effects of global climate change and nutrient  
622 enrichment on the physiology of three temperate maerl species. *Ecol Evol* **9**, 13787-  
623 13807, doi:10.1002/ece3.5802 (2019).
- 624 26 Jacoby, R. P. *et al.* Mitochondrial composition, function and stress response in plants.  
625 *J Integr Plant Biol* **54**, 887-906, doi:10.1111/j.1744-7909.2012.01177.x (2012).

- 626 27 Liberatore, K. L., Dukowic-Schulze, S., Miller, M. E., Chen, C. & Kianian, S. F. The  
627 role of mitochondria in plant development and stress tolerance. *Free Radical Biology*  
628 *and Medicine* **100**, 238-256, doi:10.1016/j.freeradbiomed.2016.03.033 (2016).
- 629 28 Hwang, Y.-s., Jung, G. & Jin, E. Transcriptome analysis of acclimatory responses to  
630 thermal stress in Antarctic algae. *Biochem Biophys Res Commun* **367**, 635-641,  
631 doi:10.1016/j.bbrc.2007.12.176 (2008).
- 632 29 Apweiler, R. *et al.* UniProt: The universal protein knowledgebase. *Nucleic Acids Res*  
633 **32**, D158-D169, doi:10.1093/nar/gkw1099 (2004).
- 634 30 Beilstein, M. A., Nagalingum, N. S., Clements, M. D., Manchester, S. R. & Mathews,  
635 S. Dated molecular phylogenies indicate a Miocene origin for *Arabidopsis thaliana*.  
636 *PNAS* **107**, 18724, doi:10.1073/pnas.0909766107 (2010).
- 637 31 Liu, Q., Liu, H., Wen, J. & Peterson, P. M. Infrageneric phylogeny and temporal  
638 divergence of sorghum (Andropogoneae, Poaceae) based on low-copy nuclear and  
639 plastid sequences. *PLoS One* **9**, e104933, doi:10.1371/journal.pone.0104933 (2014).
- 640 32 Page, T. M., McDougall, C. & Diaz-Pulido, G. *De novo* transcriptome assembly for  
641 four species of crustose coralline algae and analysis of unique orthologous genes. *Sci*  
642 *Rep* **9**, 12611, doi:10.1038/s41598-019-48283-1 (2019).
- 643 33 Marsh Jr, J. A. Primary productivity of reef-building calcareous red algae. *Ecology*  
644 **51**, 255-263, doi:10.2307/1933661 (1970).
- 645 34 Dickson, A. G., Sabine, C. L. & Christian, J. R. *Guide to best practices for ocean CO<sub>2</sub>*  
646 *measurements*. (North Pacific Marine Science Organization, 2007).
- 647 35 seacarb: seawater carbonate chemistry with R v. 3.2.12 (2019).
- 648 36 Hashimshony, T., Wagner, F., Sher, N. & Yanai, I. CEL-Seq: Single-cell RNA-Seq  
649 by multiplexed linear amplification. *Cell Rep* **2**, 666-673,  
650 doi:10.1016/j.celrep.2012.08.003 (2012).
- 651 37 Hashimshony, T. *et al.* CEL-Seq2: Sensitive highly-multiplexed single-cell RNA-Seq.  
652 *Genome Biol* **17**, 77, doi:10.1186/s13059-016-0938-8 (2016).
- 653 38 R: A language and environment for statistical computing. R Foundation for Statistical  
654 Computing (Vienna, Austria, 2014).
- 655 39 Schmieder, R. & Edwards, R. Quality control and preprocessing of metagenomic  
656 datasets. *Bioinformatics* **27**, 863-864, doi:10.1093/bioinformatics/btr026 (2011).
- 657 40 Langmead, B., Trapnell, C., Pop, M. & Salzberg, S. L. Ultrafast and memory-efficient  
658 alignment of short DNA sequences to the human genome. *Genome Biol* **10**, R25,  
659 doi:10.1186/gb-2009-10-3-r25 (2009).
- 660 41 McDougall, C., Aguilera, F., Shokohmand, A., Moase, P. & Degnan, B. M. Pearl sac  
661 gene expression profiles associated with pearl attributes in the silver-lip pearl oyster,  
662 *Pinctada maxima*. *Front Genet* **11**, 597459-597459, doi:10.3389/fgene.2020.597459  
663 (2021).
- 664 42 Grün, D., Kester, L. & van Oudenaarden, A. Validation of noise models for single-  
665 cell transcriptomics. *Nat Methods* **11**, 637-640, doi:10.1038/nmeth.2930 (2014).
- 666 43 Robinson, M. D., McCarthy, D. J. & Smyth, G. K. edgeR: a Bioconductor package  
667 for differential expression analysis of digital gene expression data. *Bioinformatics* **26**,  
668 139-140, doi:10.1093/bioinformatics/btp616 (2010).
- 669 44 Love, M. I., Huber, W. & Anders, S. Moderated estimation of fold change and  
670 dispersion for RNA-seq data with DESeq2. *Genome Biol* **15**, 550,  
671 doi:10.1186/s13059-014-0550-8 (2014).
- 672 45 pheatmap: Pretty heatmaps v. 1.0.12 (2015).
- 673 46 Shannon, P. *et al.* Cytoscape: A software environment for integrated models of  
674 biomolecular interaction networks. *Genome Res* **13**, 2498-2504,  
675 doi:10.1101/gr.1239303 (2003).

- 676 47 Heymans, K., Kuiper, M. & Maere, S. BiNGO: a Cytoscape plugin to assess  
677 overrepresentation of Gene Ontology categories in Biological Networks.  
678 *Bioinformatics* **21**, 3448-3449, doi:10.1093/bioinformatics/bti551 (2005).
- 679 48 Supek, F., Bošnjak, M., Škunca, N. & Šmuc, T. REVIGO summarizes and visualizes  
680 long lists of gene ontology terms. *PLoS One* **6**, e21800,  
681 doi:10.1371/journal.pone.0021800 (2011).
- 682 49 Altschul, S. F., Gish, W., Miller, W., Myers, E. W. & Lipman, D. J. Basic local  
683 alignment search tool. *J Mol Biol* **215**, 403-410, doi:10.1101/pdb.top17 (1990).
- 684 50 Kanehisa, M., Sato, Y., Kawashima, M., Furumichi, M. & Tanabe, M. KEGG as a  
685 reference resource for gene and protein annotation. *Nucleic Acids Res* **44**, D457-  
686 D462, doi:10.1093/nar/gkv1070 (2016).
- 687 51 Zeng, J. *et al.* Identification and analysis of house-keeping and tissue-specific genes  
688 based on RNA-seq data sets across 15 mouse tissues. *Gene* **576**, 560-570,  
689 doi:10.1016/j.gene.2015.11.003 (2016).
- 690 52 Li, B., Chen, C., Xu, Y., Ji, D. & Xie, C. Validation of housekeeping genes as internal  
691 controls for studying the gene expression in *Pyropia haitanensis* (Bangiales,  
692 Rhodophyta) by quantitative real-time PCR. *Acta Oceanologica Sinica* **33**, 152-159,  
693 doi:10.1007/s13131-014-0526-2 (2014).
- 694 53 Rozen, S. & Skaletsky, H. Primer3 on the WWW for general users and for biologist  
695 programmers. *Methods Mol Biol* **132**, 365-386, doi:10.1385/1-59259-192-2:365  
696 (2000).
- 697 54 Vandesompele, J. *et al.* Accurate normalization of real-time quantitative RT-PCR data  
698 by geometric averaging of multiple internal control genes. *Genome Biol* **3**, 1-12,  
699 doi:10.1186/gb-2002-3-7-research0034 (2002).
- 700
